# Supplementary material
Source: PubMed Central journal article supplement (PMC5678940)

## Integrating DNA methylation and hydroxymethylation data with the mint pipeline

Raymond G. Cavalcante<sup>1</sup>, Snehal Patil<sup>1</sup>, Laura S. Rozek<sup>2</sup>, and Maureen A. Sartor<sup>1</sup>

<sup>1</sup>Department of Computational Medicine and Bioinformatics, and <sup>2</sup>Department of Environmental Health Sciences, University of Michigan, Ann Arbor, MI

### Supplementary Information

**Supplementary Table 1 – Example of sample metadata and covariate information to be used in setting up a mint project.** The table should be tab-delimited and placed in the mint/projects folder with a filename of the form [projectID]\_samples.txt. This ensures that the init.R initialization script looks at the proper metadata table for the project. The sampleID column will often not be human readable (i.e. automatically named .fastq.gz files provided by a sequencing core, GEO, or SRA). The humanID column is meant to connect human understandable names to the automatically generated IDs. The pulldown, bisulfite, mc, hmc, and input columns are binary where 0 means no and 1 means yes. In the example below, any bisulfite sample has a 1 in the mc and hmc columns to indicate that the platform (in this case ERRBS) cannot distinguish between them. The group column can contain multiple comma-separated numbers if a sample belongs to more than one group (e.g. “1,2”). Columns appearing after the group column are considered covariates to be used in the models used for differential methylation testing with csaw and DSS. Column headers for covariate columns *must match* the variables as they appear in the model and covariate columns of the comparisons table (Table S2).

| projectID   | sampleID                | humanID   | pulldown | bisulfite | mc | hmc | input | group | subject | age |
|-------------|-------------------------|-----------|----------|-----------|----|-----|-------|-------|---------|-----|
| test_hybrid | IDH2mut_1_hmeseal       | IDH2mut_1 | 1        | 0         | 0  | 1   | 0     | 1     | 1       | 3   |
| test_hybrid | IDH2mut_2_hmeseal       | IDH2mut_2 | 1        | 0         | 0  | 1   | 0     | 1     | 2       | 3   |
| test_hybrid | IDH2mut_1_hmeseal_input | IDH2mut_1 | 1        | 0         | 0  | 1   | 1     | 1     | 1       | 3   |
| test_hybrid | IDH2mut_2_hmeseal_input | IDH2mut_2 | 1        | 0         | 0  | 1   | 1     | 1     | 2       | 3   |
| test_hybrid | IDH2mut_1_errbs         | IDH2mut_1 | 0        | 1         | 1  | 1   | 0     | 1     | 1       | 3   |
| test_hybrid | IDH2mut_2_errbs         | IDH2mut_2 | 0        | 1         | 1  | 1   | 0     | 1     | 2       | 3   |
| test_hybrid | NBM_1_hmeseal           | NBM_1     | 1        | 0         | 0  | 1   | 0     | 0     | 1       | 10  |
| test_hybrid | NBM_2_hmeseal           | NBM_2     | 1        | 0         | 0  | 1   | 0     | 0     | 2       | 10  |
| test_hybrid | NBM_1_hmeseal_input     | NBM_1     | 1        | 0         | 0  | 1   | 1     | 0     | 1       | 10  |
| test_hybrid | NBM_2_hmeseal_input     | NBM_2     | 1        | 0         | 0  | 1   | 1     | 0     | 2       | 10  |
| test_hybrid | NBM_1_errbs             | NBM_1     | 0        | 1         | 1  | 1   | 0     | 0     | 1       | 10  |
| test_hybrid | NBM_2_errbs             | NBM_2     | 0        | 1         | 1  | 1   | 0     | 0     | 2       | 10  |

**Supplementary Table 2 – Example of comparison metadata and model information to be used in setting up a mint project.** The purpose of this table is to encode information needed for testing differential methylation with csaw and/or DSS with a filename of the form [projectID]\_comparisons.txt. The pulldown, bisulfite, mc, and hmc columns are as in Supplementary Table 1. Here, the input column takes values of TRUE or FALSE and indicates whether the input for a comparison of IP data should be used to filter out windows for analysis in csaw. The model column is used to build the design matrix. The contrast column should be a binary vector indicating which coefficient from the model to test in csaw and DSS. The covariates column lists the covariates used in the model formula (comma-delimited if more than one and NA if none). The entries of this columns should also match the column headings in the sample matrix (Table S1). The covIsNumeric column indicates whether the covariate is numerical (1) or categorical (0). The groups column indicates the group numbers from the sample matrix (Table S1) to use for the test. The interpretation is a comma-delimited list indicating what interpretation to give to regions with logFC (csaw) or methdiff (DSS) < 0 (first entry) or >= 0 (second entry).

| projectID   | comparison           | pulldown | bisulfite | mc | hmc | input | model            | contrast | covariates | covIsNumeric | groups | interpretation |
|-------------|----------------------|----------|-----------|----|-----|-------|------------------|----------|------------|--------------|--------|----------------|
| test_hybrid | IDH2mut_v_NBM        | 1        | 0         | 0  | 1   | TRUE  | ~1+group         | 0,1      | NA         | 0            | 0,1    | NBM,IDH2mut    |
| test_hybrid | IDH2mut_v_NBM        | 0        | 1         | 1  | 1   | FALSE | ~1+group         | 0,1      | NA         | 0            | 0,1    | NBM,IDH2mut    |
| test_hybrid | IDH2mut_v_NBM_paired | 1        | 0         | 0  | 1   | TRUE  | ~1+group+subject | 0,1,0    | subject    | 0            | 0,1    | NBM,IDH2mut    |
| test_hybrid | IDH2mut_v_NBM_paired | 0        | 1         | 1  | 1   | FALSE | ~1+group+subject | 0,1,0    | subject    | 0            | 0,1    | NBM,IDH2mut    |
| test_hybrid | IDH2mut_v_NBM_cont   | 1        | 0         | 0  | 1   | TRUE  | ~1+group+age     | 0,1,0    | age        | 1            | 0,1    | NBM,IDH2mut    |
| test_hybrid | IDH2mut_v_NBM_cont   | 0        | 1         | 1  | 1   | FALSE | ~1+group+age     | 0,1,0    | age        | 1            | 0,1    | NBM,IDH2mut    |

**Supplementary Table 3 – Classification scheme for integrating methylation and hydroxymethylation data.**

**(A) The sample-wise classifier.** Rows are classifications given to 5mC + 5hmC signal from WGBS or RRBS and columns are 5hmC signal from hMeDIP-seq or hMe-Seal. The classifier operates on the intersection of the two signal tracks. Regions of no signal are determined either by the lack of coverage (5mC + 5hmC from WGBS or RRBS) or a lack of input coverage (5hmC from hMeDIP-seq or hMe-Seal). **(B) The comparison-wise classifier.** Rows are classifications given to 5mC + 5hmC differential methylation signal from DSS. Columns are 5hmC differential methylation signal from csaw. The classifier operates on the intersection of the two signal tracks. Hyper/hypo is written with respect to condition 1 of the comparison.

|                       |                       |                      |                  |                |
|-----------------------|-----------------------|----------------------|------------------|----------------|
| <b>A.</b>             | <b>hmc peak</b>       | <b>No hmc peak</b>   | <b>No signal</b> |                |
| <b>High hmc + mc</b>  | hmc                   | mc                   | hmc or mc        |                |
| <b>Low hmc + mc</b>   | hmc                   | mc (low)             | hmc or mc (low)  |                |
| <b>No hmc + mc</b>    | hmc                   | no methylation       | no methylation   |                |
| <b>No signal</b>      | hmc                   | no methylation       | unclassifiable   |                |
| <b>B.</b>             | Hyper hmc             | Hypo hmc             | No DM            | No signal      |
| <b>Hyper hmc + mc</b> | Hyper mc<br>Hyper hmc | Hyper mc<br>Hypo hmc | Hyper mc         | Hyper mc       |
| <b>Hypo hmc + mc</b>  | Hypo mc<br>Hyper hmc  | Hypo mc<br>Hypo hmc  | Hypo mc          | Hypo mc        |
| <b>No DM</b>          | Hyper hmc             | Hypo hmc             | No DM            | No DM          |
| <b>No signal</b>      | Hyper hmc             | Hypo hmc             | No DM            | unclassifiable |

**Supplementary Figure 1 – Overview of Galaxy tools used in the mint pipeline.** The tools are organized in modules similar to the command line, with a flow based on Figure 1C. Users can create workflows based on the individual tools, or Galaxy workflows are provided (Figure S2).

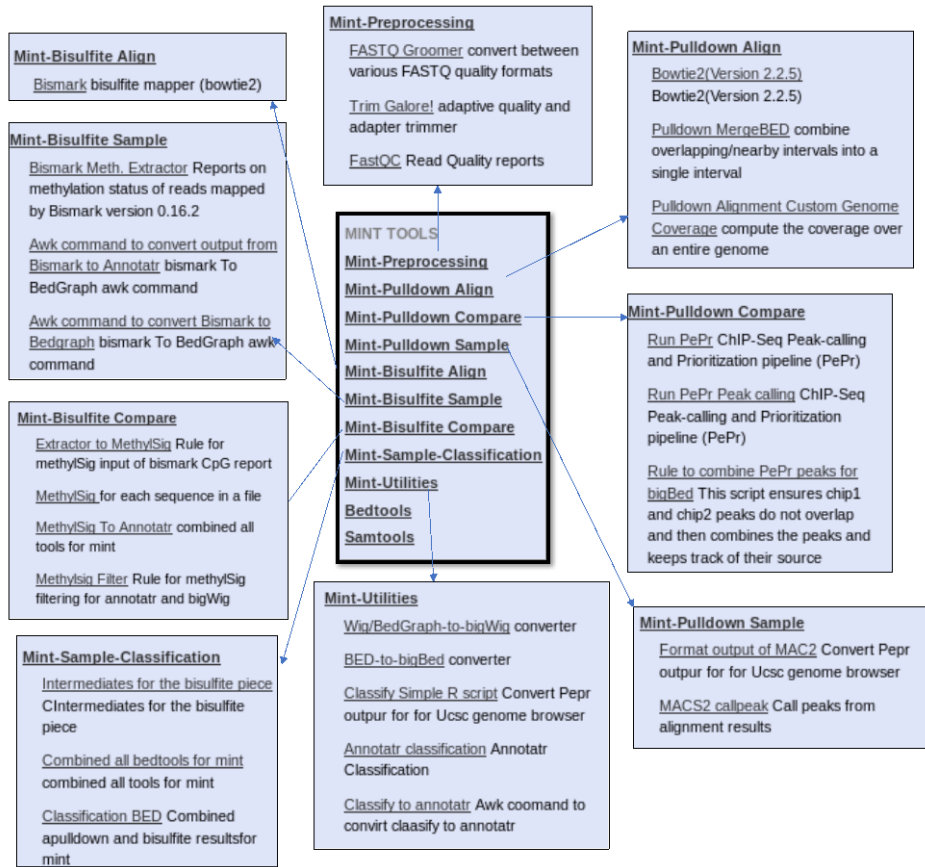

**Supplementary Figure 2 – Galaxy workflow screenshots.** Workflows in Galaxy function as pipelines, and the Galaxy implementation of mint includes workflows for each of the modules in the command line version. (A) Workflow for bisulfite\_align, (B) pulldown\_align, (C) bisulfite\_sample, (D) pulldown\_sample, (E) bisulfite\_compare, (F) pulldown\_compare, (G) sample\_classification, and (H) compare\_classification modules.

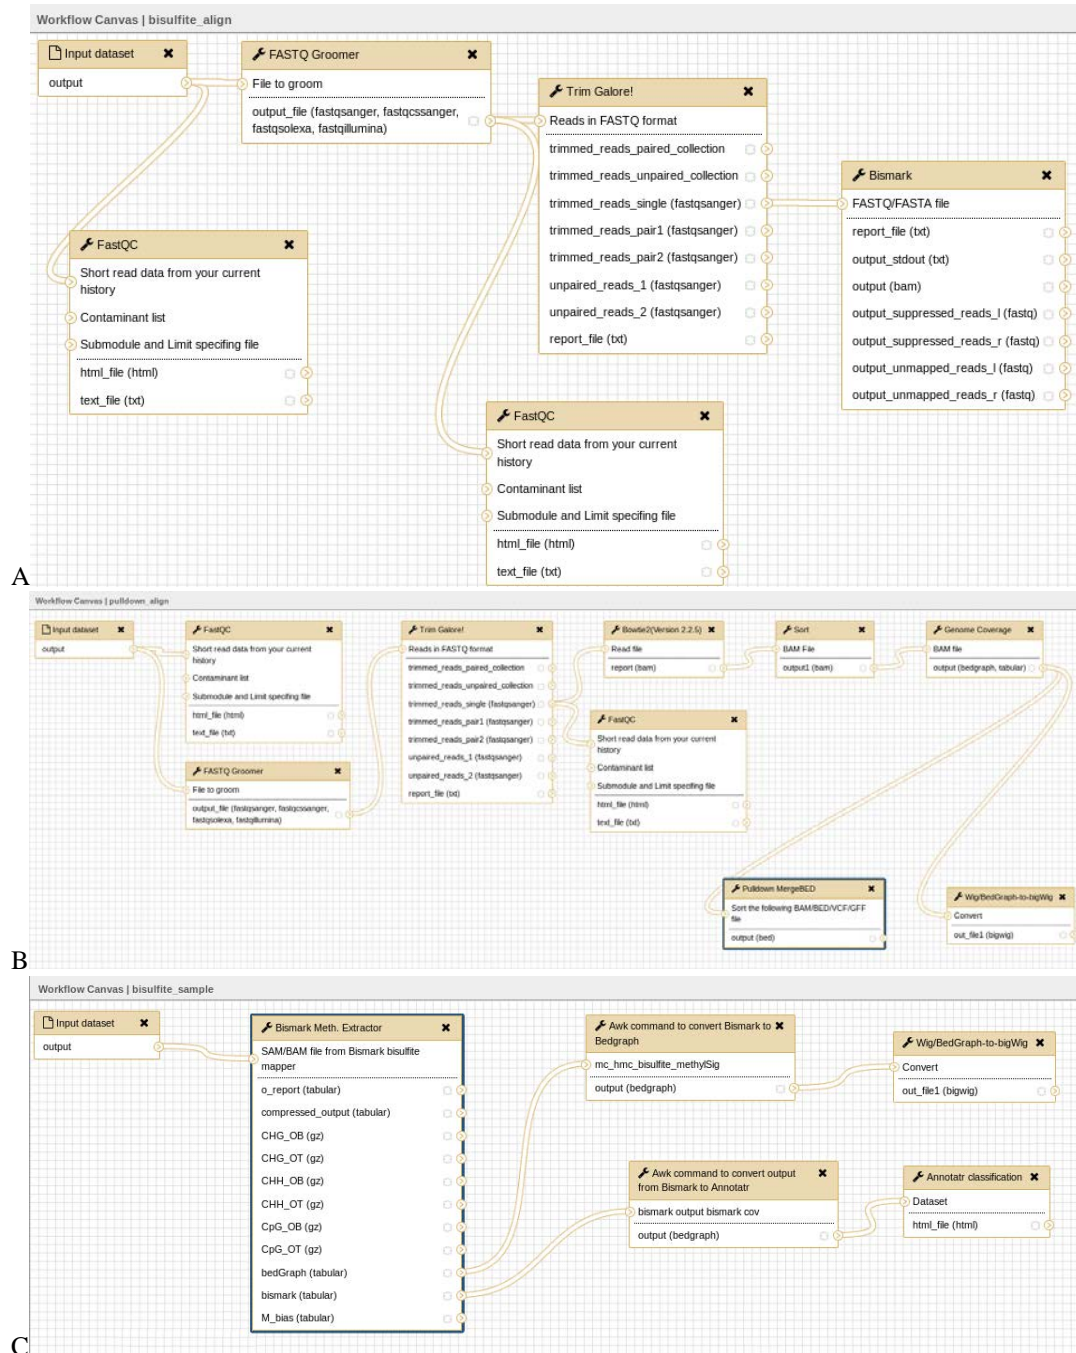

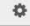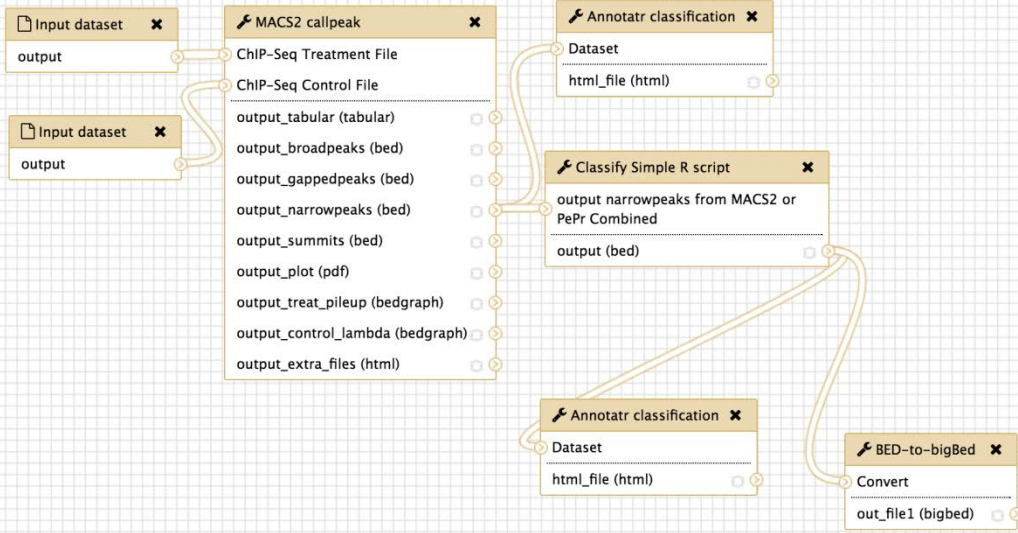

D

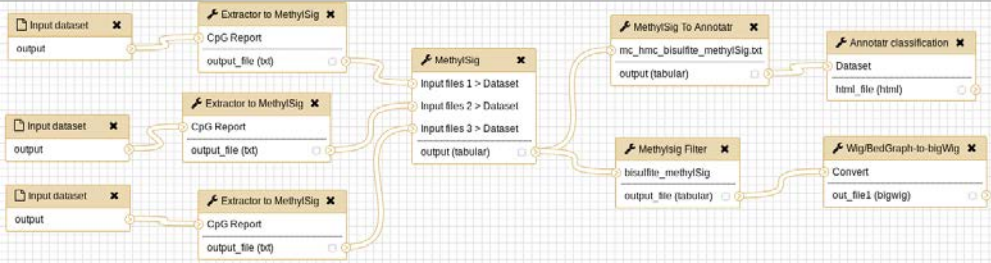

E

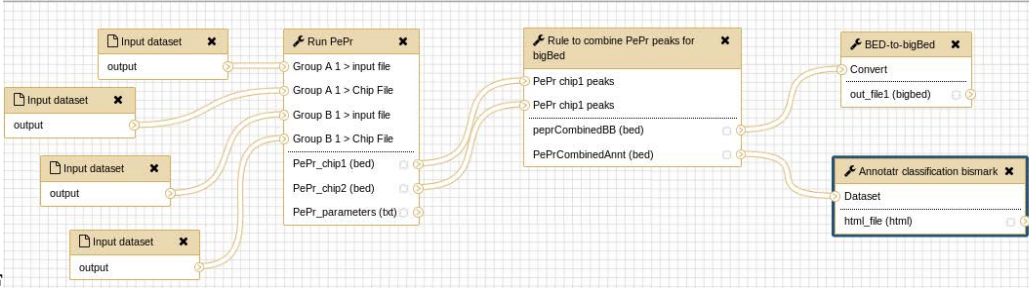

F

Workflow Canvas | sample\_classification

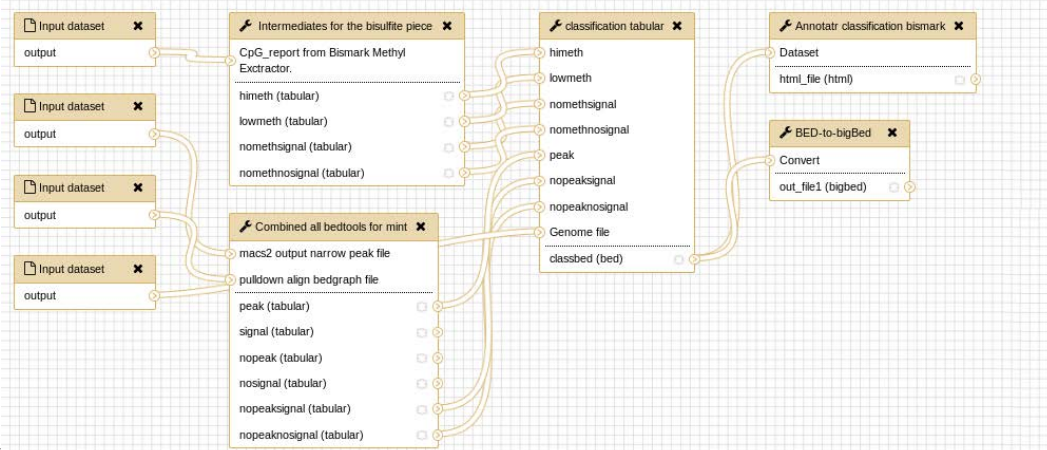

G

Workflow Canvas | compare\_classification

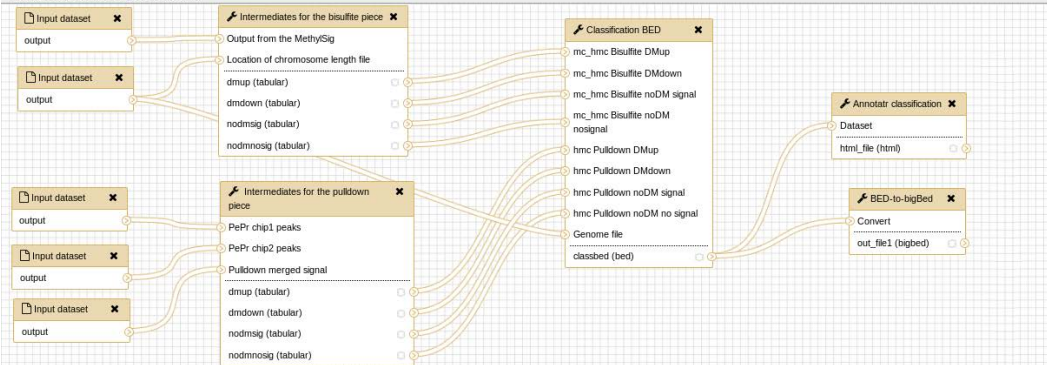

H

**Supplementary Figure 3 – Selected outputs from the pulldown\_sample and bisulfite\_sample modules.** Each graphic is part of the automatic output at the genome annotation step for both sample modules. Sample IDH2mut\_1 is shown as the example. (A) Fold change of macs2 peaks measuring hydroxymethylation across genomic annotations. Gray bars denote the fold change distribution for peaks annotated to the feature labeling the facet, and red outlines are the overall distribution of peak fold changes. Of note is the hyper-hydroxymethylation present in peaks annotated to enhancers and 5’UTRs compared to background. (B) Percent methylation of CpGs across genomic annotations. Gray bars and red outlines are as in panel A. Of note is the hypo-methylation of CpGs annotated to enhancers and 5’UTRs relative to background, especially in light of corresponding hyper-hydroxymethylation. (C) Annotations of the ‘simple classification’ (low, medium, high) of hydroxymethylation peaks are similarly distributed across CpG features regardless of peak strength. (D) Annotations of the ‘simple classification’ (no, low, medium, high) of percent methylation of CpGs have different distributions across CpG features according to strength of methylation. In particular, as methylation weakens, it tends to be located more in CpG islands (orange), but less in CpG shelves (blue).

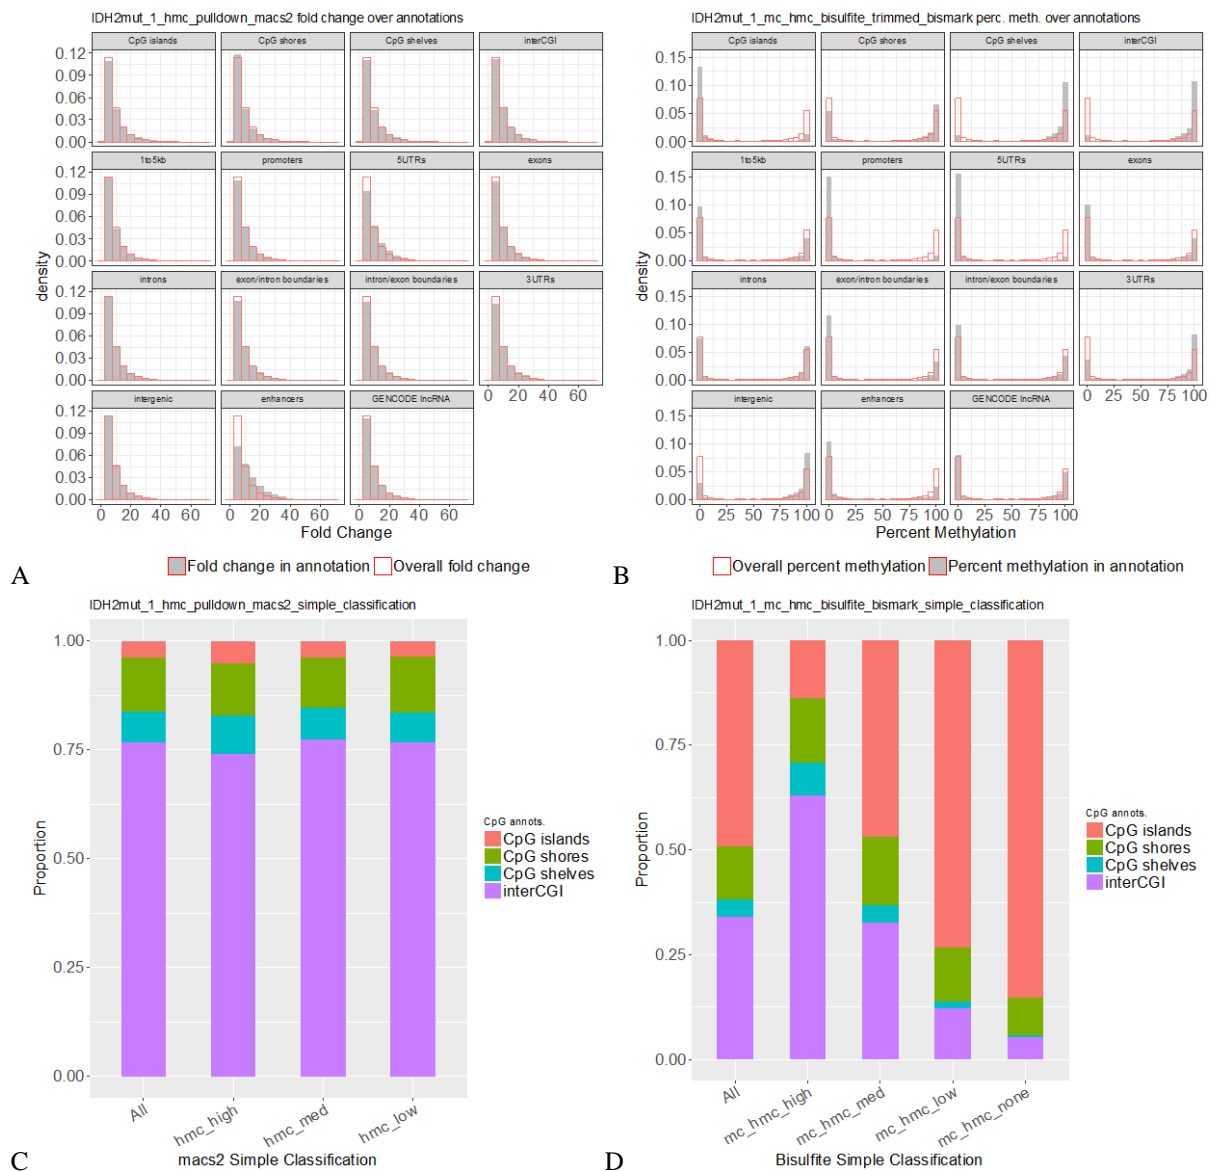



**Supplementary Figure 4 – Selected outputs from the compare (A – E) and classification (F – H) modules comparing IDH2 mutants with NBM samples. (A)** Number of DMRs found by DSS, and annotated to CpG island features. The number of hyper-methylated DMRs in the IDH2 samples is greater than those in NBM samples, in line with previous findings. **(B)** The Genome Browser with csaw track showing ‘NBM’ peaks (hypo-hydroxymethylated in IDH2 mutants) as was found in the paper originally describing the AML data. **(C)** Hypo-hydroxymethylated regions in IDH2 mutants occur more frequently at 5’ ends of genes and exons than hyper-hydroxymethylated regions. **(D)** Conversely, hyper-methylated regions in IDH2 mutants occur more frequently at 5’ ends of genes and exons than hypo-methylated regions. **(E)** Hyper-methylated regions occur more frequently at or near CpG islands than hypo-methylated regions. **(F)** Genomic annotation to CpG features for sample-wise classification of 5mC and 5hmC signals in the IDH2mut\_2 sample. Combined 5mC (mc and mc\_low) classifications occur more frequently in CpG islands (orange) than 5hmC. **(G)** Genomic annotation to CpG features of DhMR and DMR signal in the comparison of IDH2 mutant to NBM samples. **(H)** Genomic annotation to genic features, enhancers, and GENCODE lncRNA of the same integration in (G).

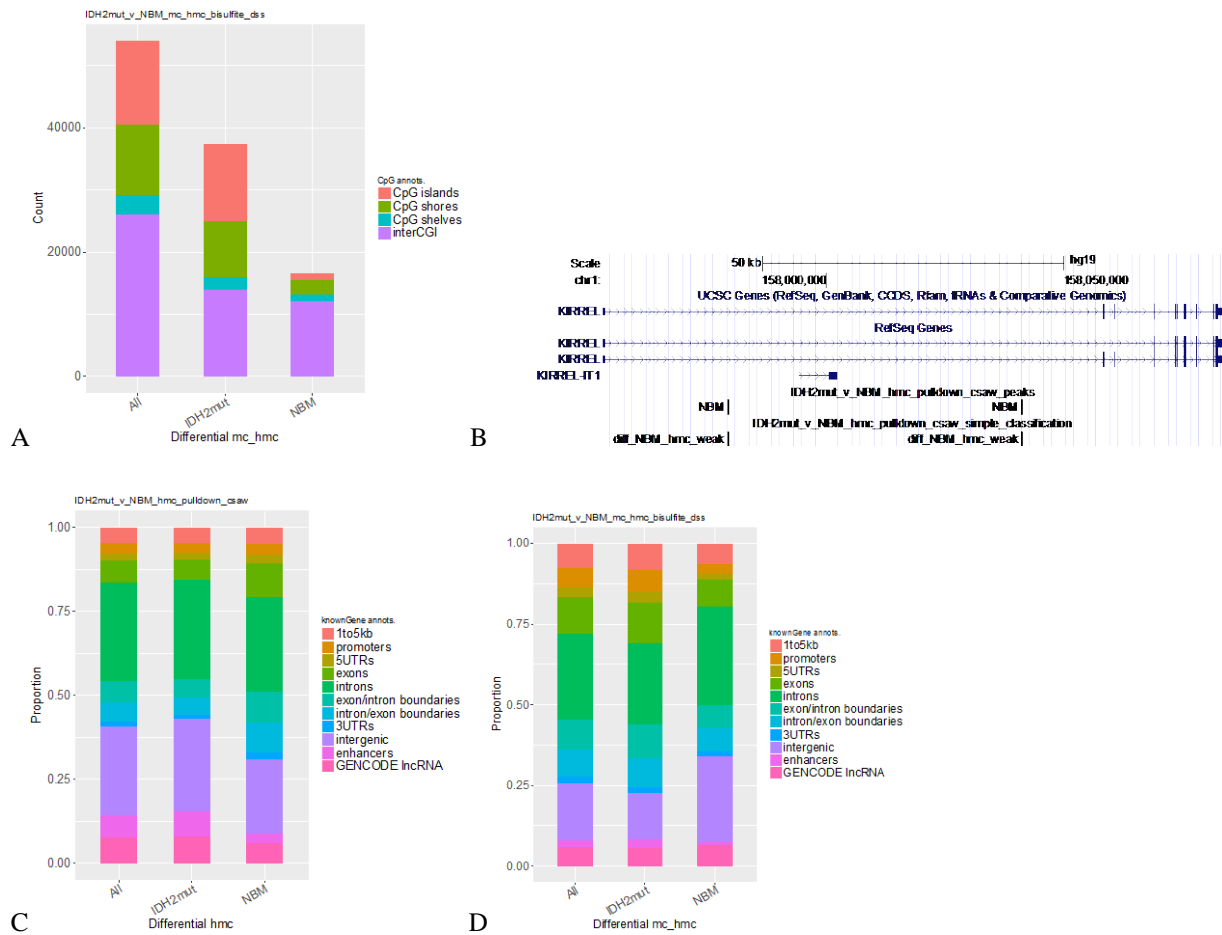

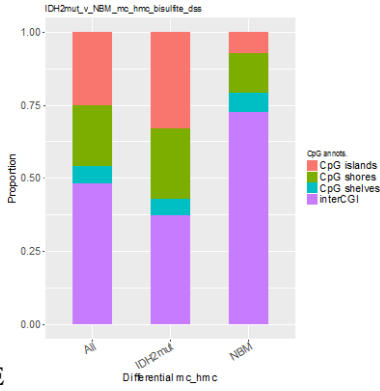

E

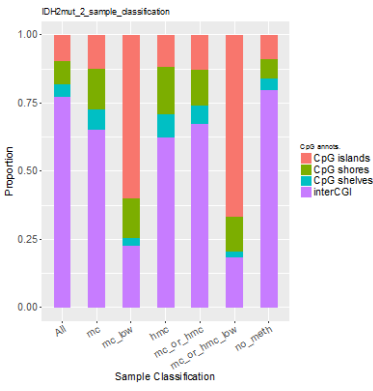

F

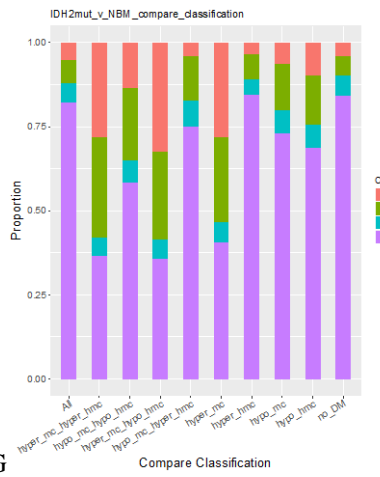

G

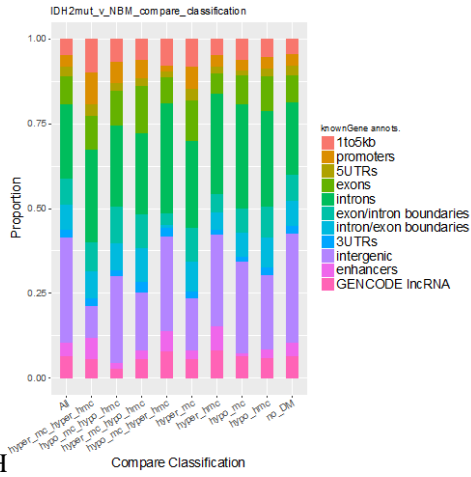

H

**Supplementary Figure 5 – A display of the entire UCSC Genome Browser track hub.** All tracks from the track hub are displayed for a genomic region containing MTA2 and EML3, which shows simultaneous hypo-hydroxymethylation and hyper-methylation in IDH2 mutants. Tracks have a default grouping based on the track type, but are easily rearranged by the user. For example, the track from the compare\_classification module is grouped with the csaw and DSS tracks since the classification track is the intersection of the latter two.

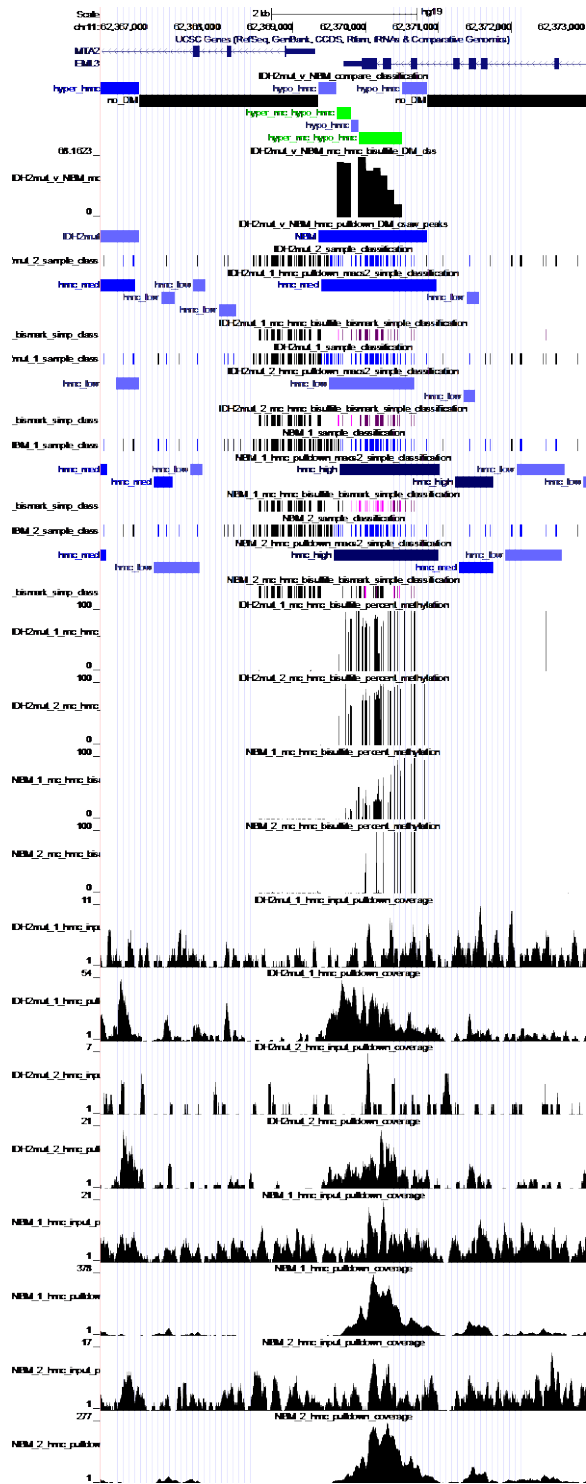

Supplement: NIHMS894377-supplement-1.pdf [file NIHMS894377-supplement-1.pdf]
